# Supplementary material for: Future tropospheric ozone budget and distribution over east Asia under a net-zero scenario
Source: Copernicus journal article supplement (doi:10.5194/acp-23-15395-2023), 2023-12-18
Supplement: Supplementary file 1 [file acp-23-15395-2023-supplement.pdf]

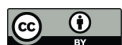

*Supplement of*

## **Future tropospheric ozone budget and distribution over east Asia under a net-zero scenario**

**Xuewei Hou et al.**

*Correspondence to:* Xuewei Hou ([houxw@nuist.edu.cn](mailto:houxw@nuist.edu.cn))

The copyright of individual parts of the supplement might differ from the article licence.

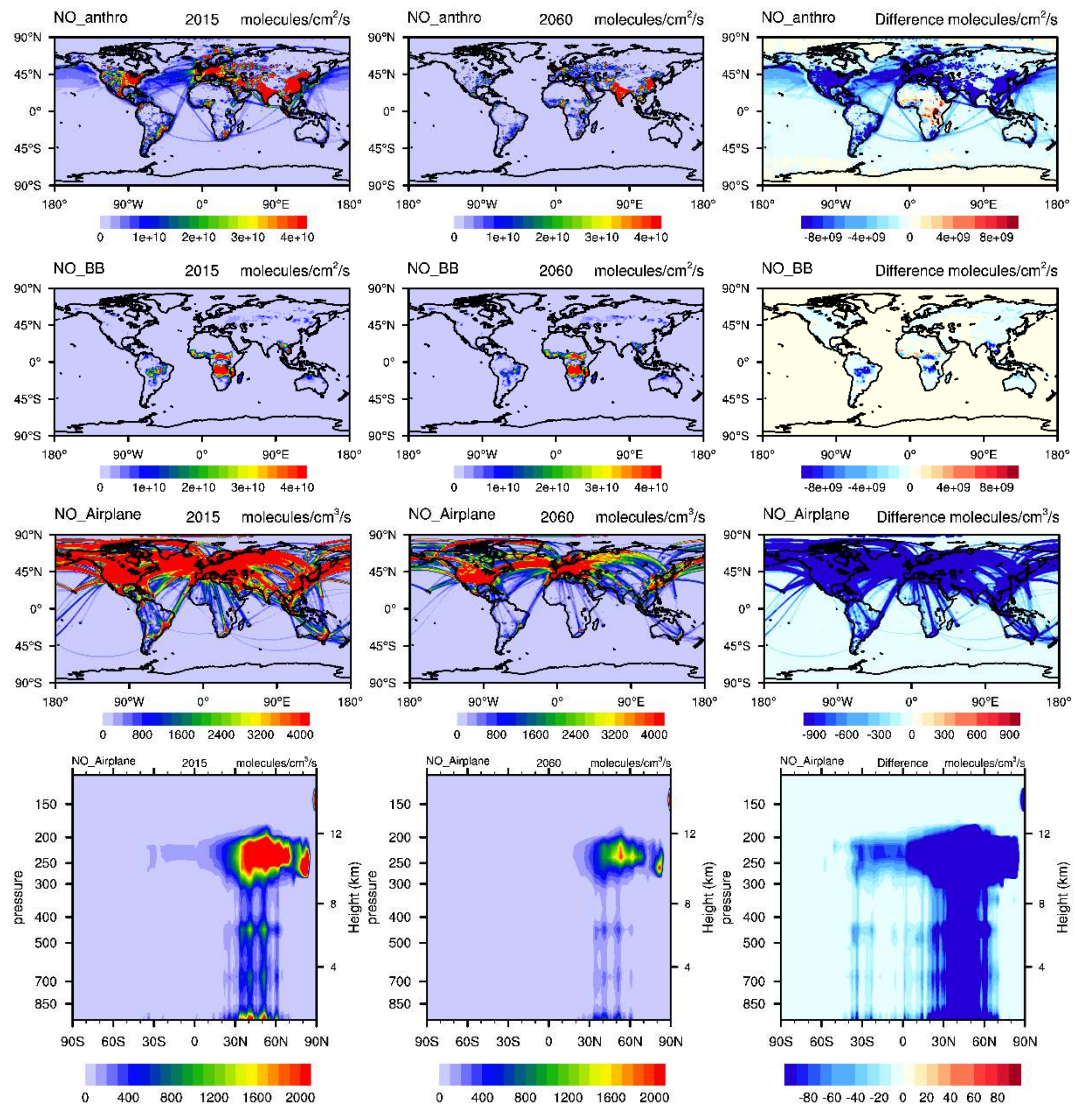

Figure S1 The biomass burning (BB), anthropogenic (anthro), and horizontal and vertical airplane emissions of NO<sub>x</sub> in 2015 (PD, left), 2060 (Net Zero, middle) and their differences (right).

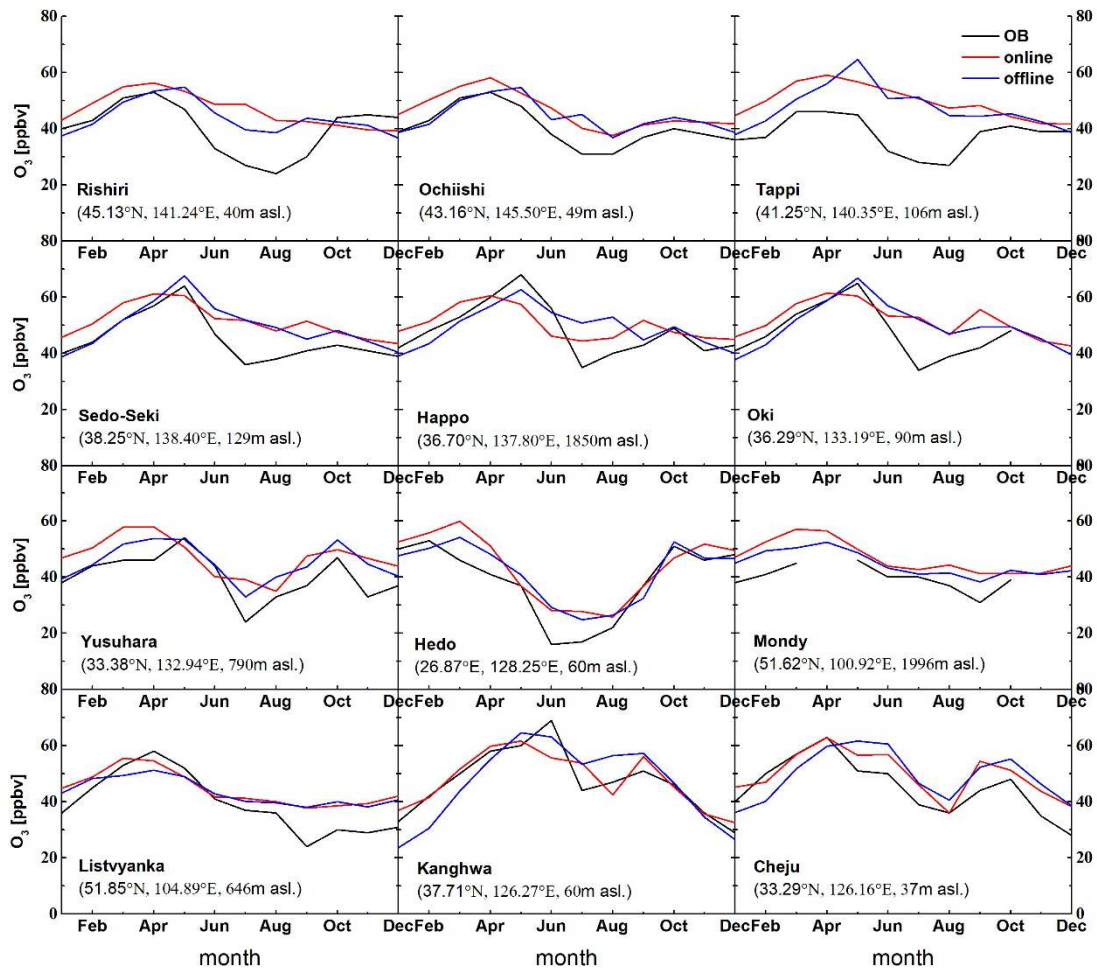

Figure S2 The comparisons of surface O<sub>3</sub> (ppbv) among EANET observations (black), online-PD (red), and offline-PD (blue) simulated results in 2015. The online simulated data is monthly mean from 2015 to 2016.

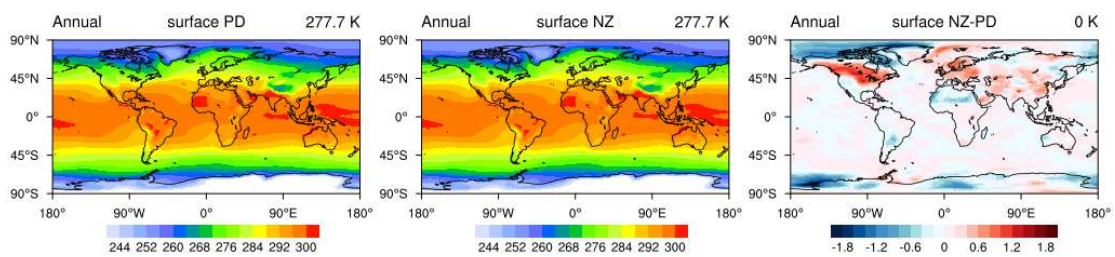

Figure S3 Distribution of annual surface air temperature (K) in present day (left, PD) and net zero (middle, NZ), and their difference (right, NZ-PD). The values in the right corner of each sub-figure are the average on the globe.

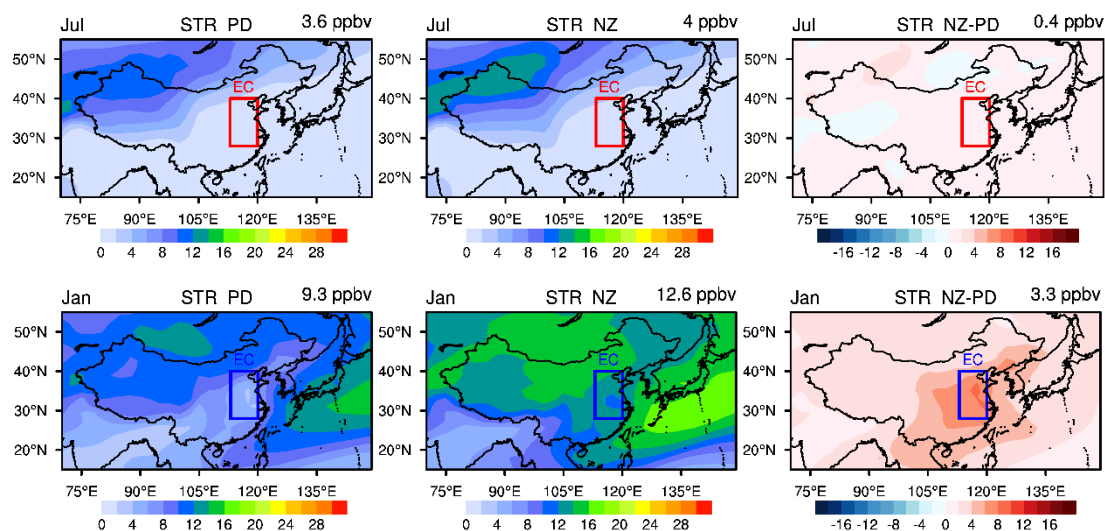

Figure S4 The contributions of stratospheric O<sub>3</sub> (STR) on surface (ppbv) over East Asia for January and July in present day (PD, online simulation, left), the changes between PD and NZ (NZ minus PD, online simulation, middle), and the changes due to emissions (NZ minus PD, offline simulation, right). The values in the right corner of each sub-figure are the regional average over East Asia (15°~55°N, 70°~149°E). The frame is the region of Eastern China (EC, 28°~40°N, 113°~120°E).
